# Supplementary material
Source: PubMed Central journal article supplement (PMC8241473)

**(a) Sample size**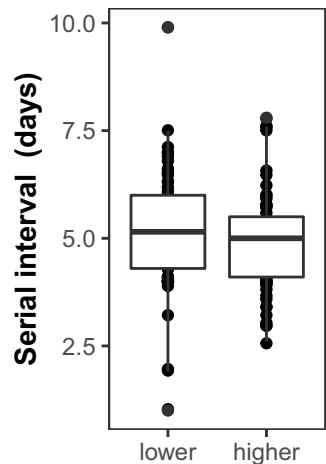**(b) Duration**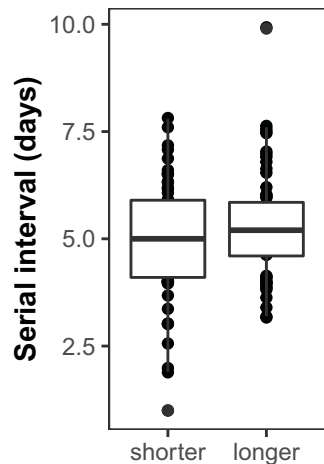**(c) Distribution type**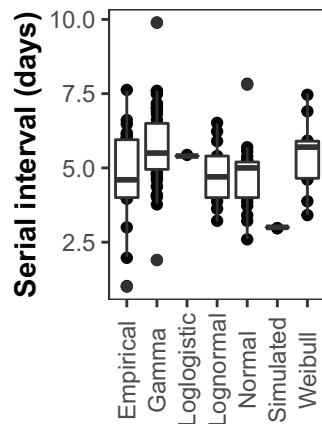**(d) Setting**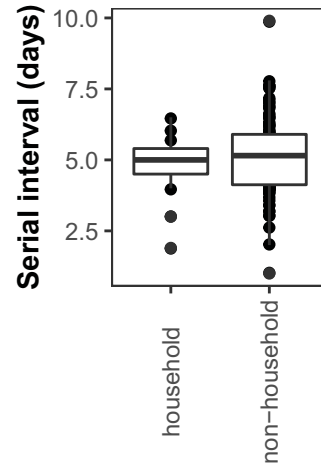**(e) Truncation**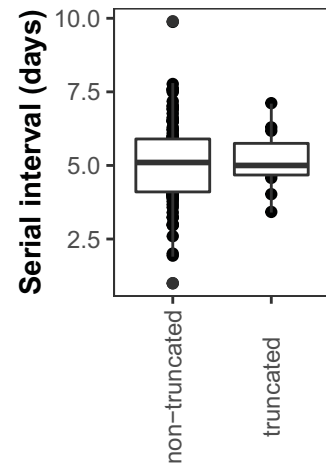**(f) Sample size (Mainland China)**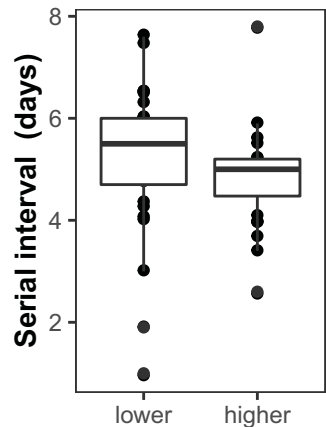**(g) Duration (Mainland China)**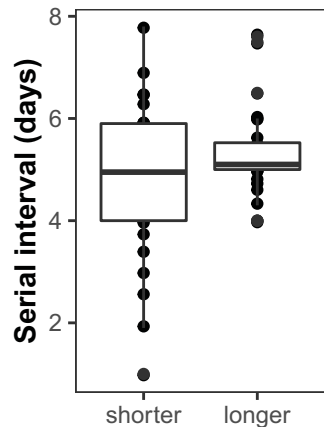**(h) Distribution type (Mainland China)**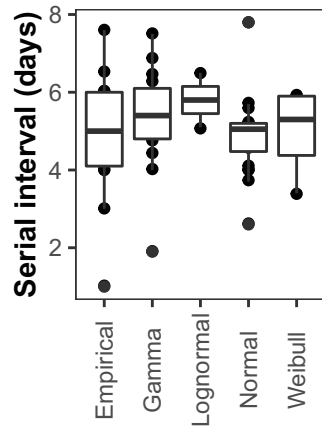**(i) Setting (Mainland China)**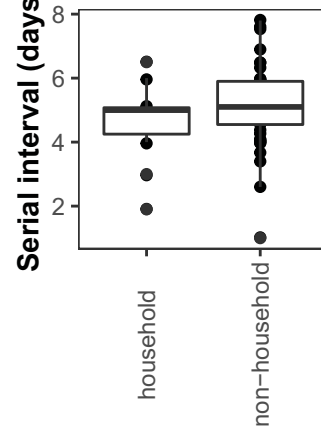**(j) Truncation (Mainland China)**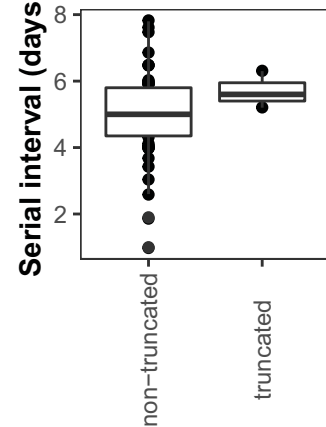

Supplement: ciab491_suppl_supplementary_figure_s1.pdf [file ciab491_suppl_supplementary_figure_s1.pdf]
