# Supplementary material
Source: PubMed Central journal article supplement (PMC8241473)

**(a) Sample size**

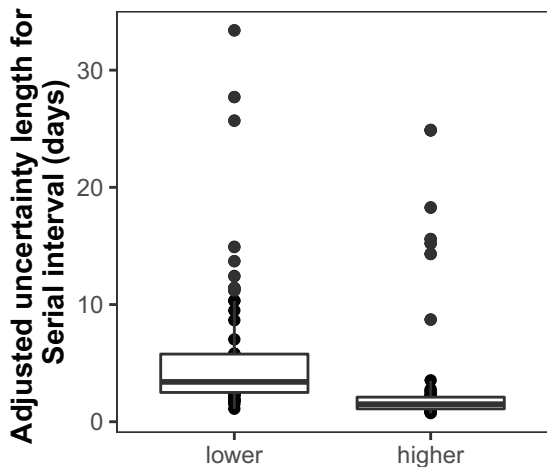

**(b) Duration**

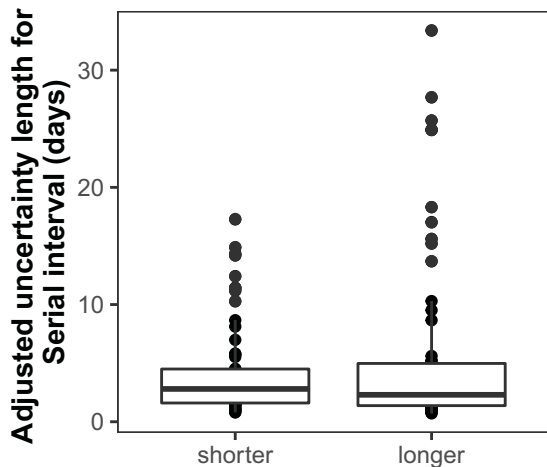

**(c) Sample size  
(Mainland China)**

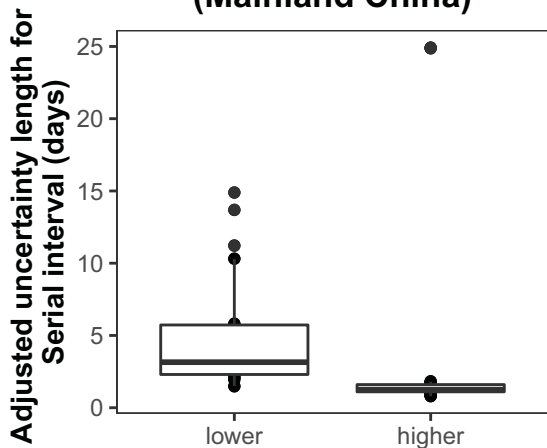

**(d) Duration  
(Mainland China)**

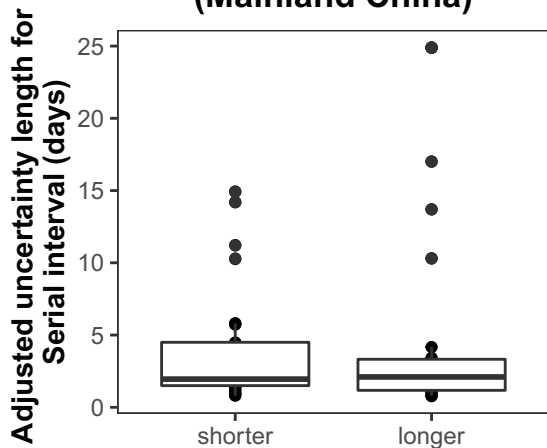

Supplement: ciab491_suppl_supplementary_figure_s2.pdf [file ciab491_suppl_supplementary_figure_s2.pdf]

# Serial interval estimate based on Mid date

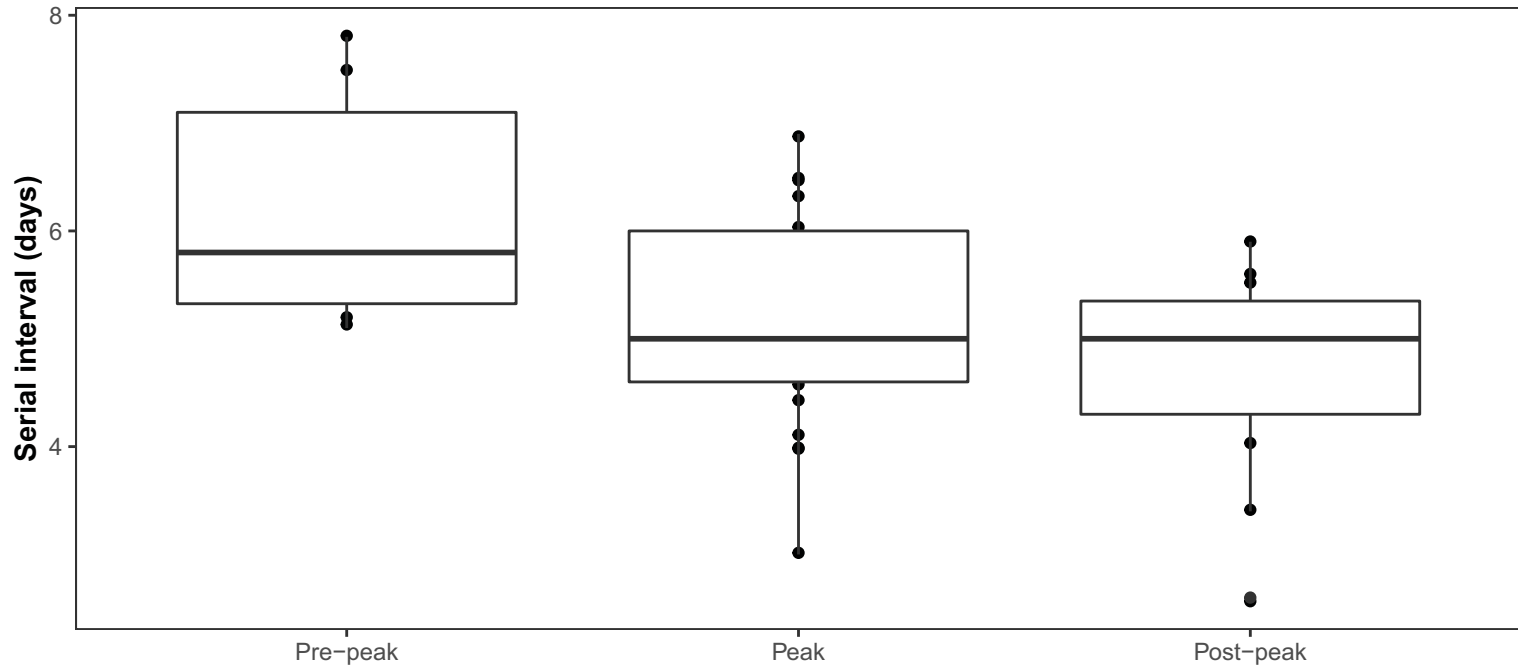

Supplement: ciab491_suppl_supplementary_figure_s3.pdf [file ciab491_suppl_supplementary_figure_s3.pdf]

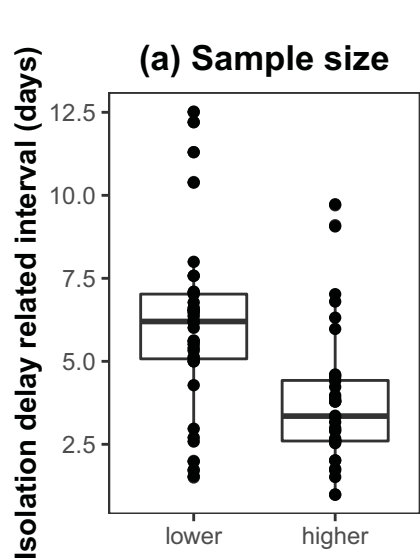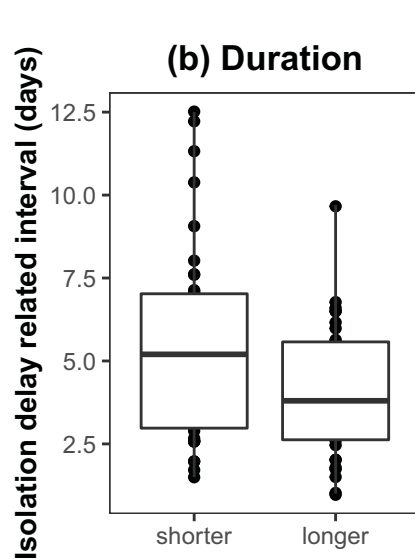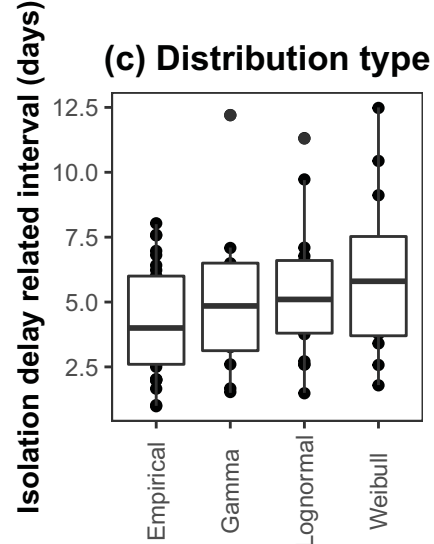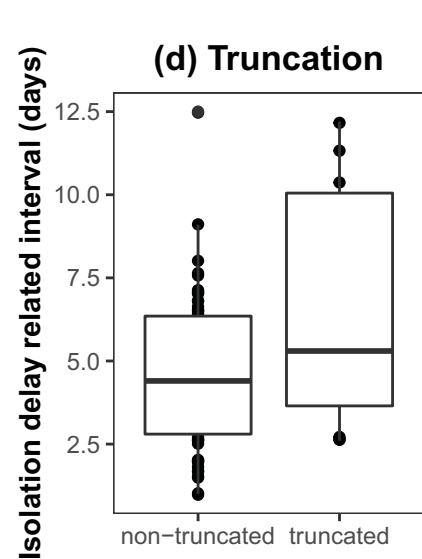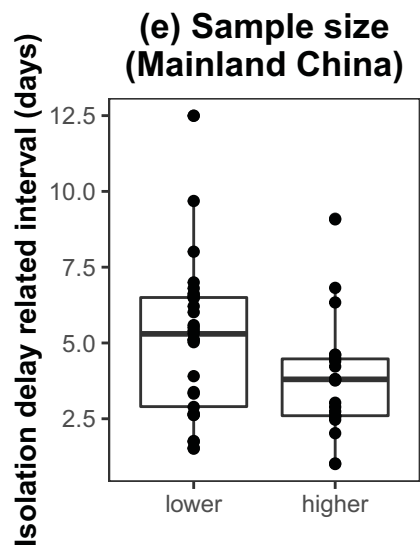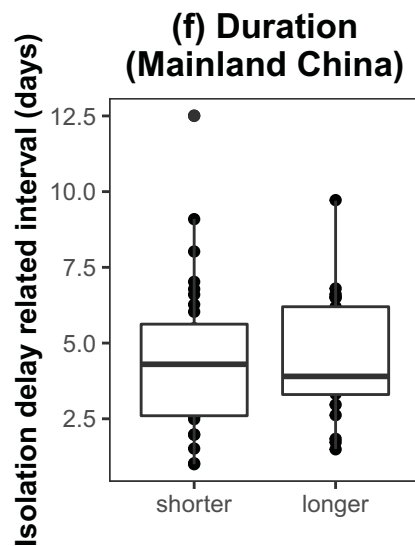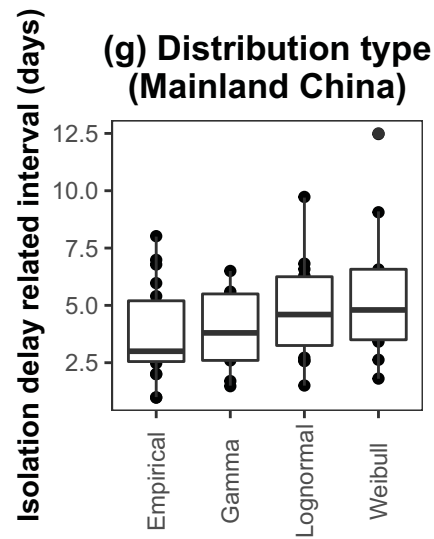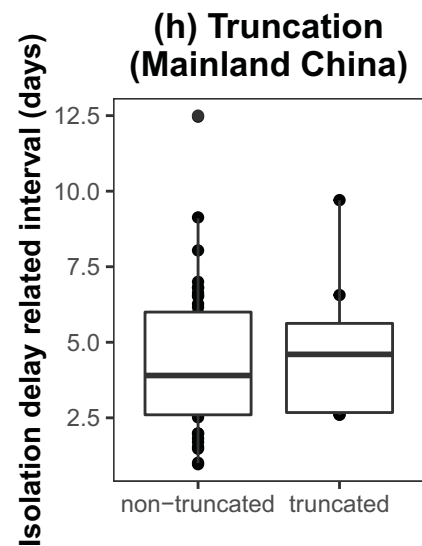

Supplement: ciab491_suppl_supplementary_figure_s4.pdf [file ciab491_suppl_supplementary_figure_s4.pdf]

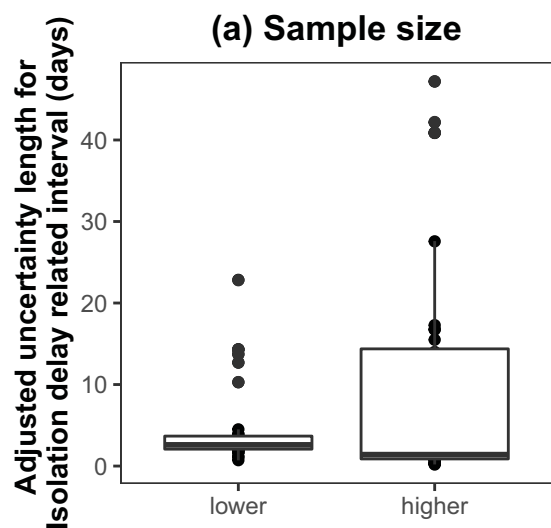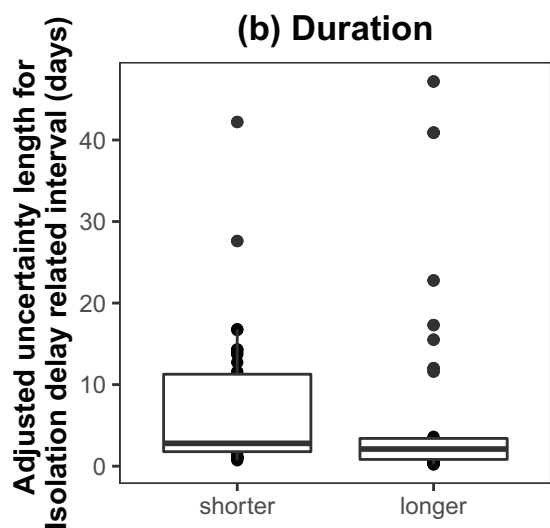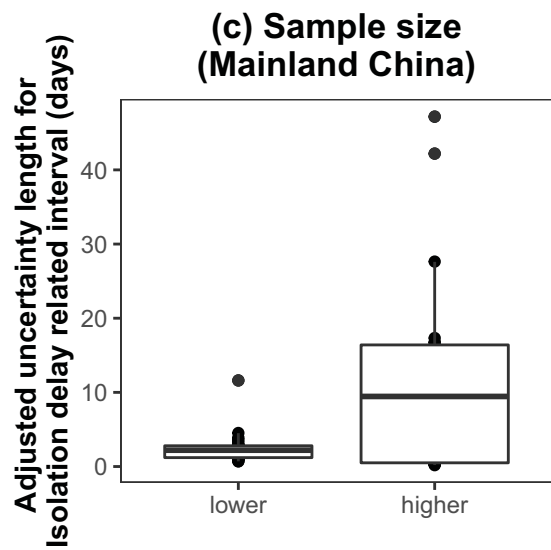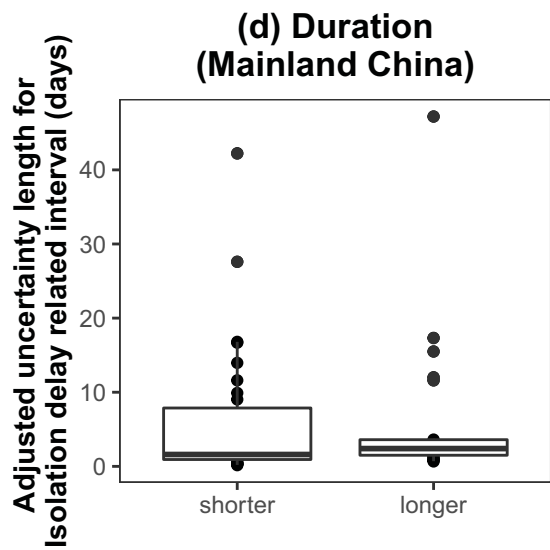

Supplement: ciab491_suppl_supplementary_figure_s5.pdf [file ciab491_suppl_supplementary_figure_s5.pdf]

# Isolation delay related interval based on Mid date

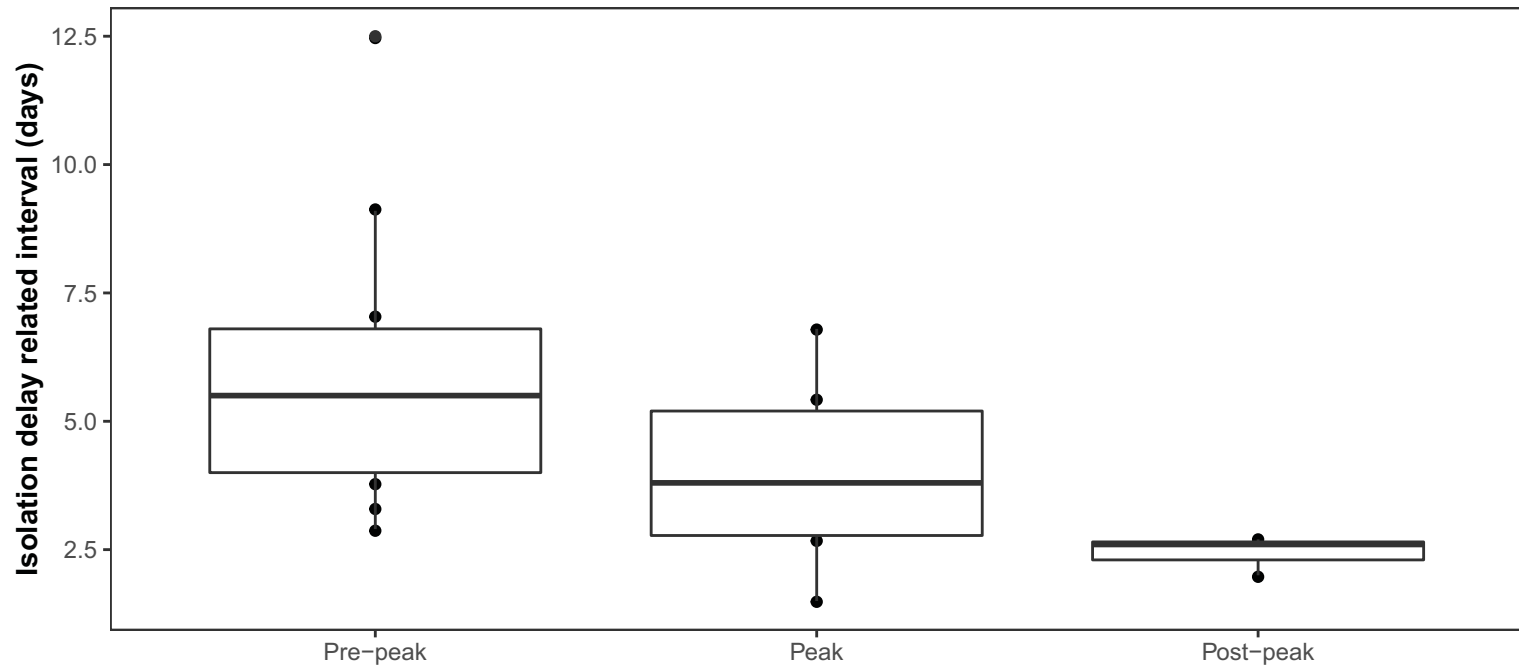

Supplement: ciab491_suppl_supplementary_figure_s6.pdf [file ciab491_suppl_supplementary_figure_s6.pdf]

Serial interval (days)

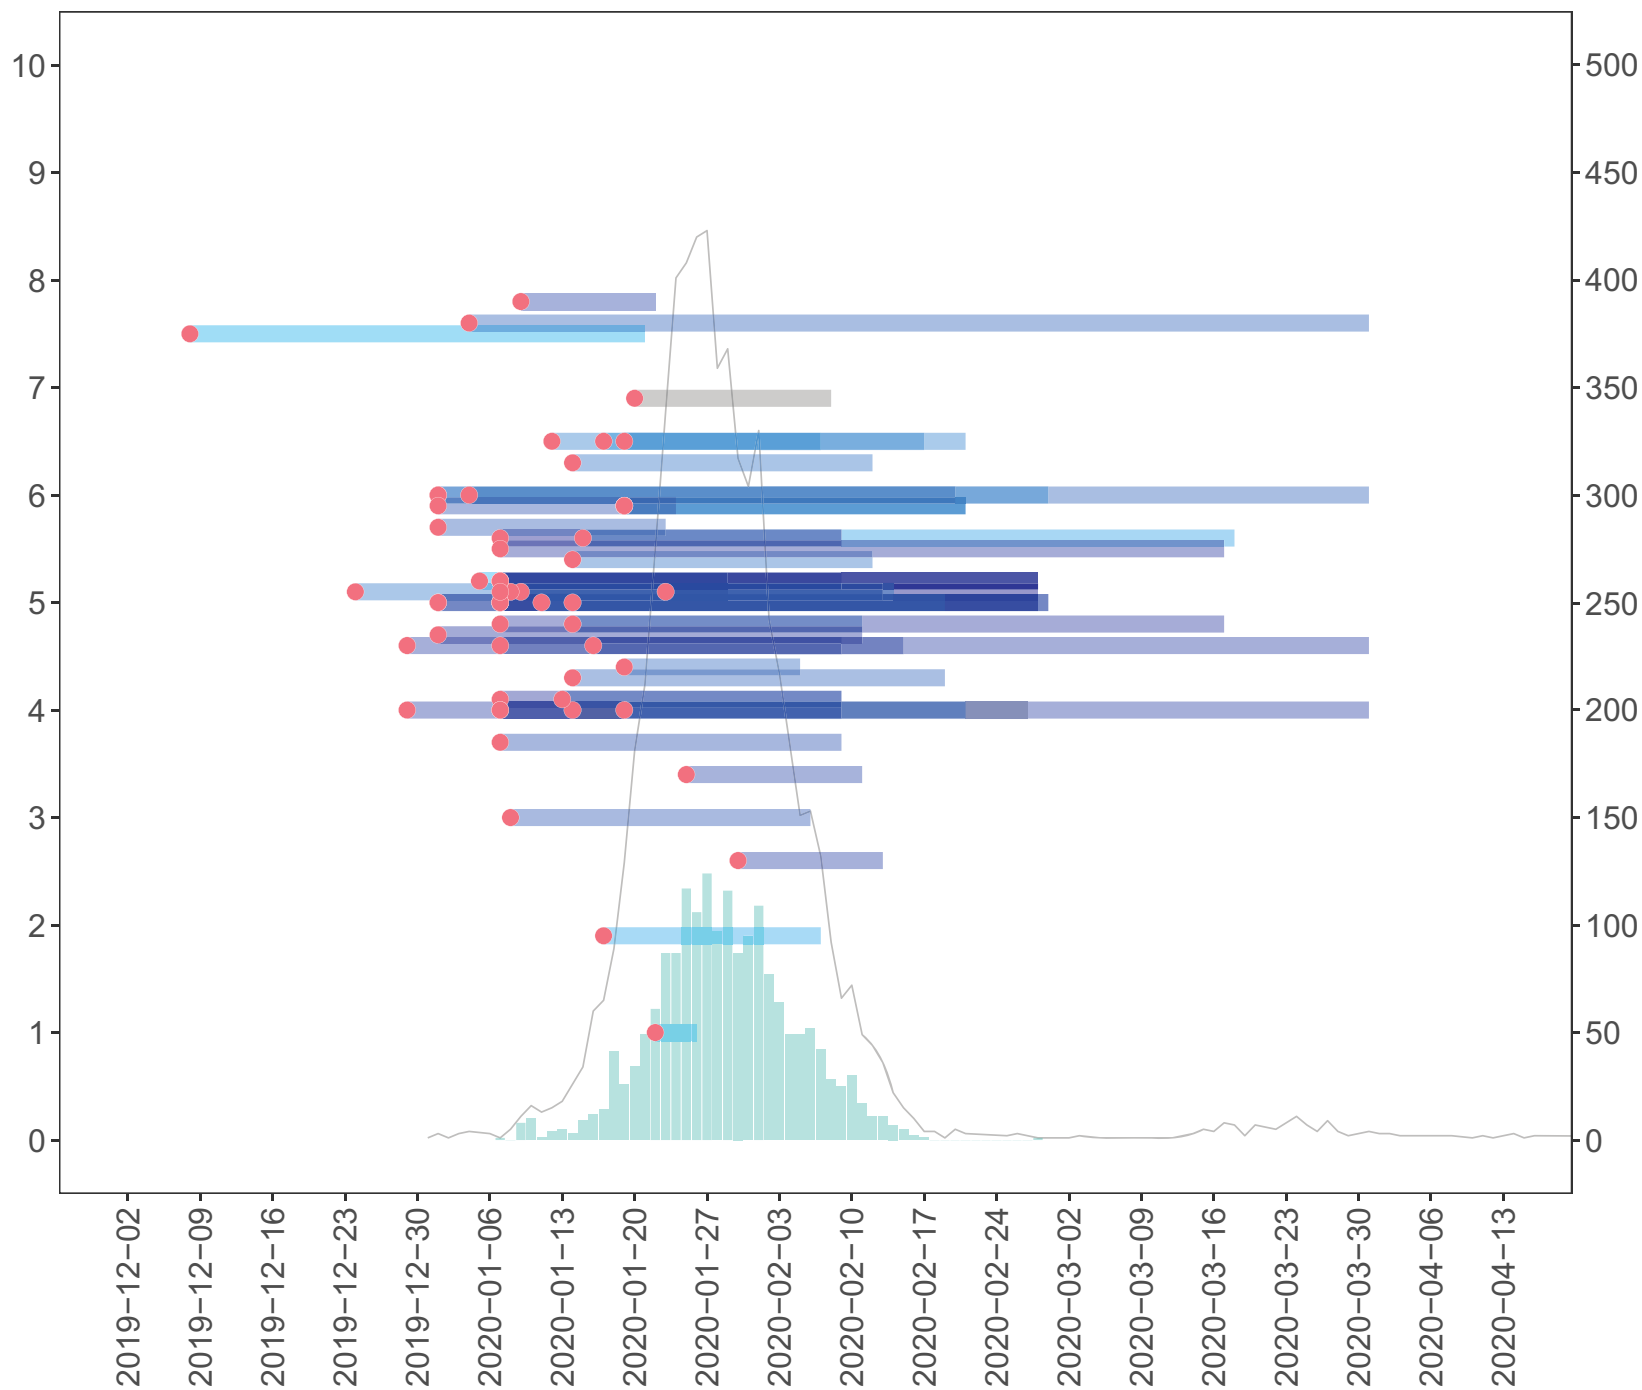

Daily Cases (Onset)

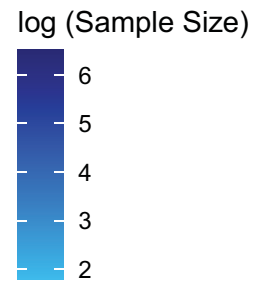

Onset Date

Supplement: ciab491_suppl_supplementary_figure_s7.pdf [file ciab491_suppl_supplementary_figure_s7.pdf]

Isolation delay related interval (days)

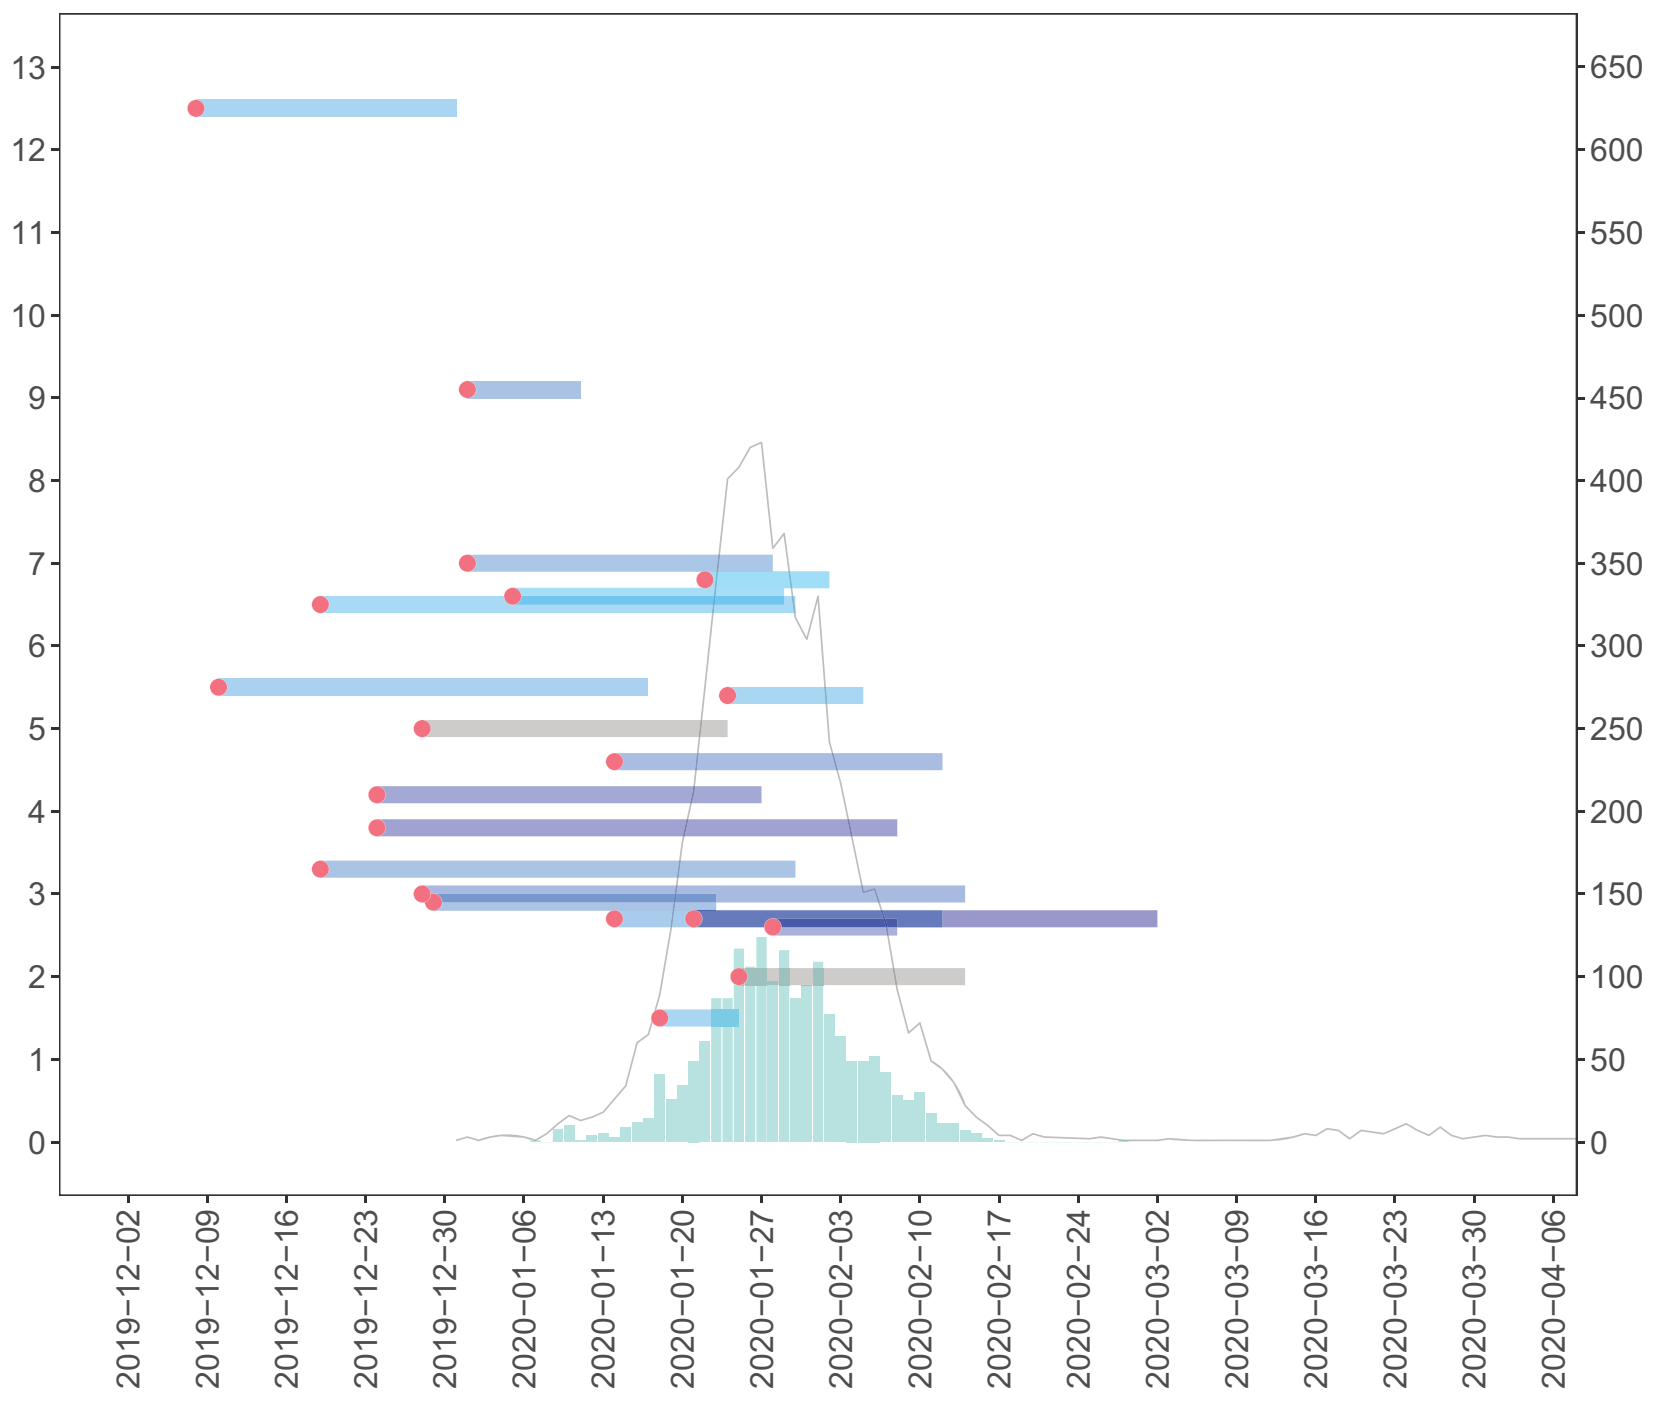

Daily Cases (Onset)

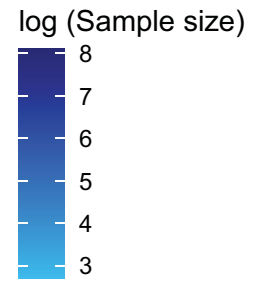

Onset Date

Supplement: ciab491_suppl_supplementary_figure_s8.pdf [file ciab491_suppl_supplementary_figure_s8.pdf]
